# Supplementary material
Source: JCI journal article supplement (doi:10.1172/jci198095)

Full unedited gel for Figure 1F

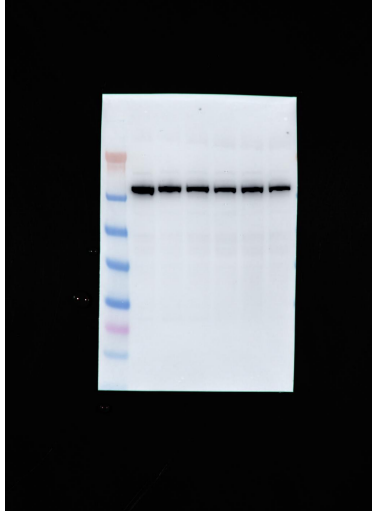

Full unedited gel for Figure 1G

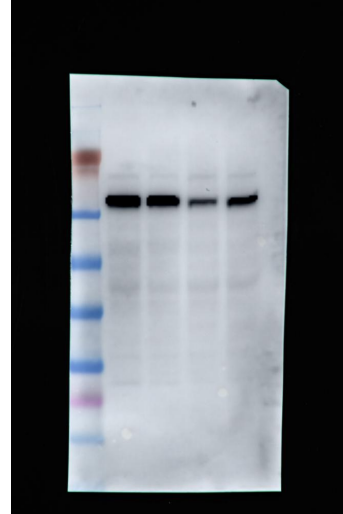

Full unedited gel for Figure 1H

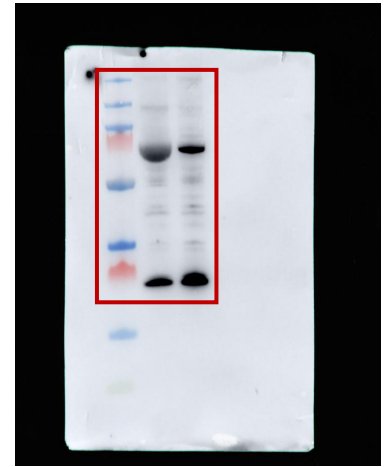

$\beta$  actin full bot Fig 1F

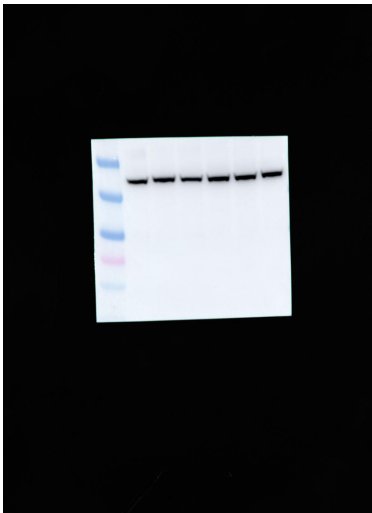

$\beta$  actin full bot Fig 1G

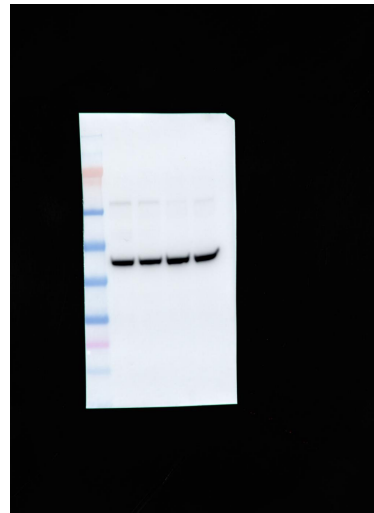

$\beta$  actin full bot Fig 1H

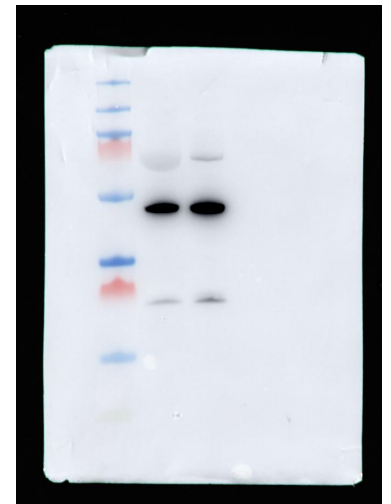

Full unedited gel for Figure 8C

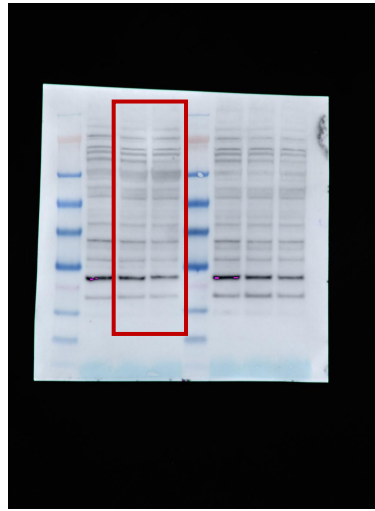

8D

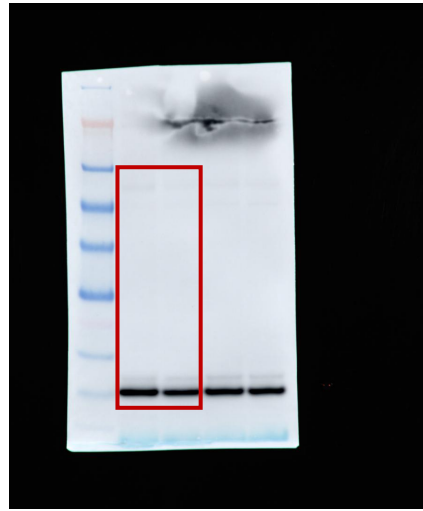

8F

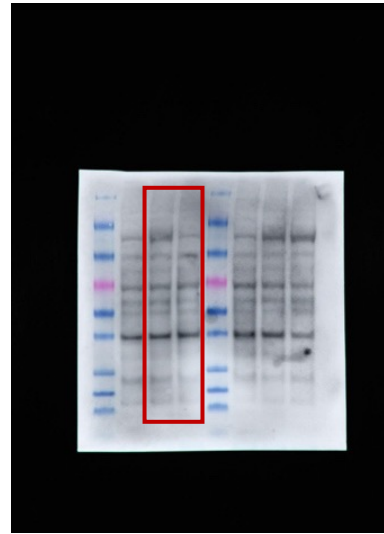

8G

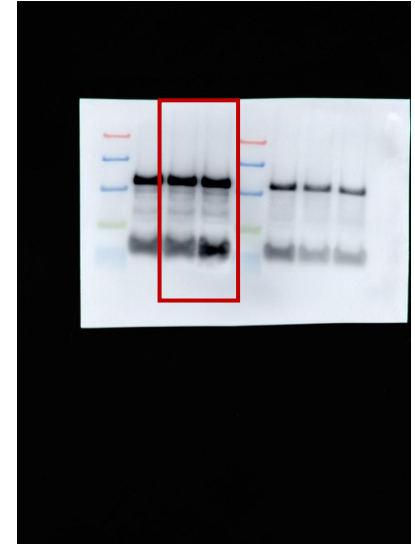

$\beta$  actin full bot Fig 8C

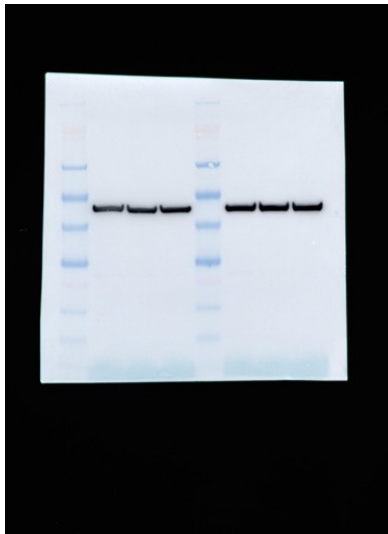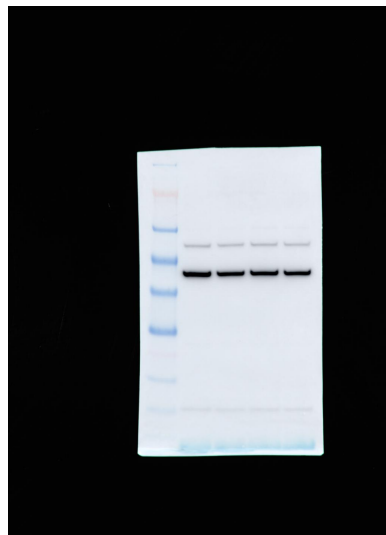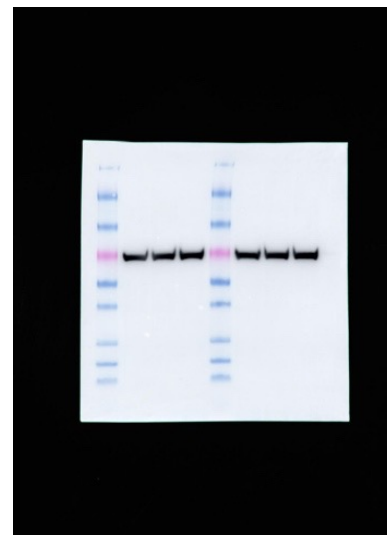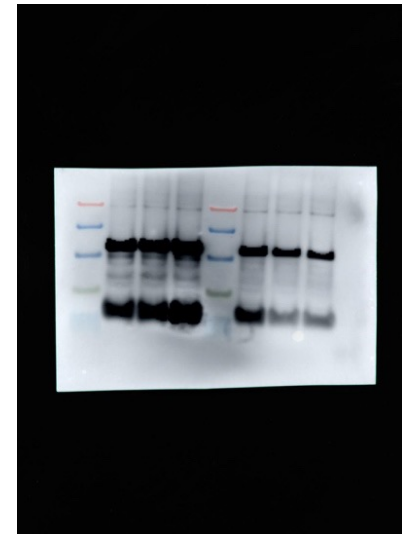

Full unedited gel for Supplemental Figure 5H  
CHREBP

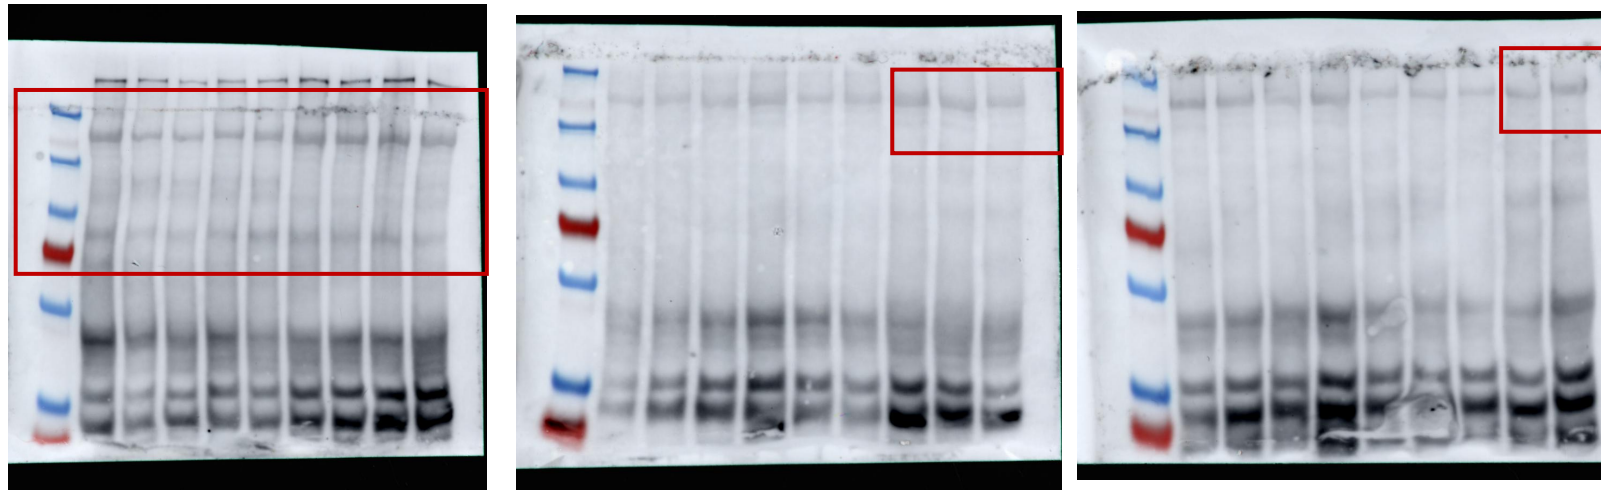

Full unedited gel for Supplemental Figure 6A

Androgen receptor

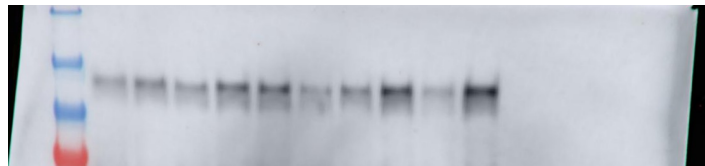

Full unedited gel for Supplemental Figure 5J

FASN

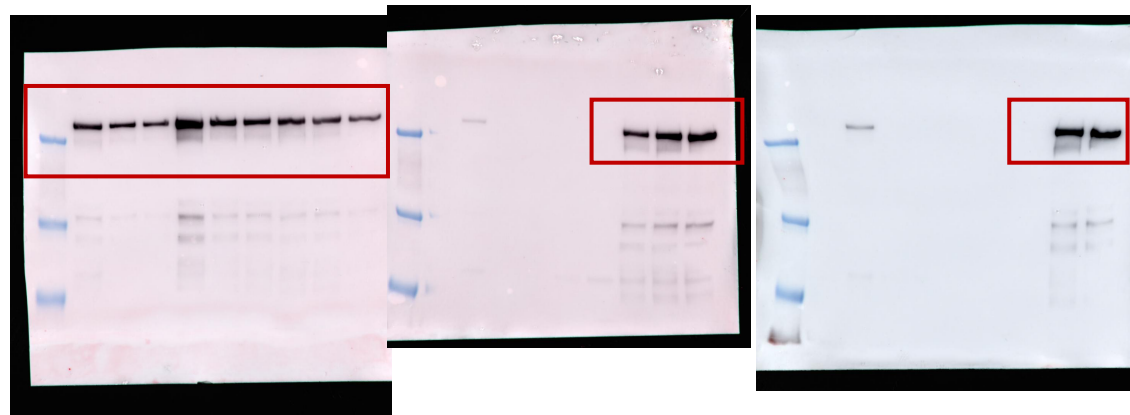

Full unedited gel for Supplemental Figure 5L

SREBP-1

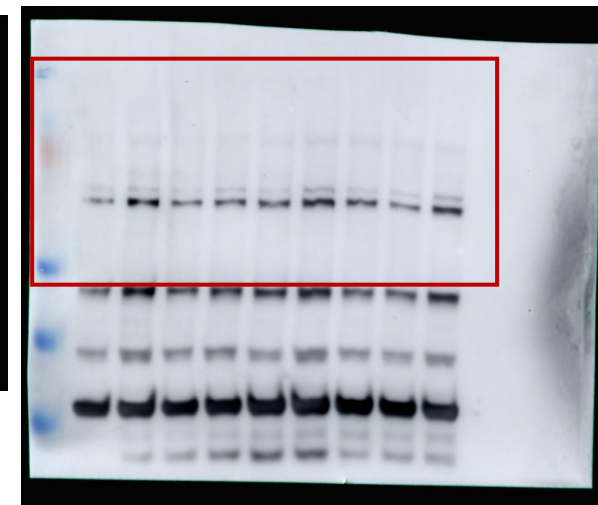

Full unedited gel for Supplemental Figure 6C

Androgen receptor

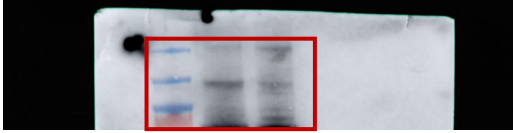

Full unedited gel for Supplemental Figure 4F

SGLT2

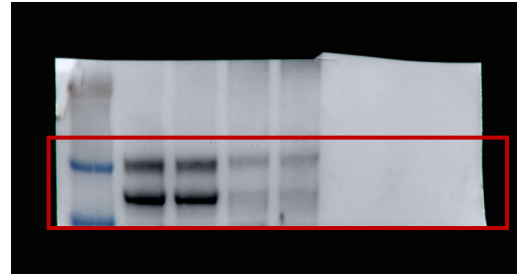

Supplement: sd2 [file 2]
