# Supplementary material
Source: JCI journal article supplement (doi:10.1172/jci198095)
Supplement: sd1 [file 1]

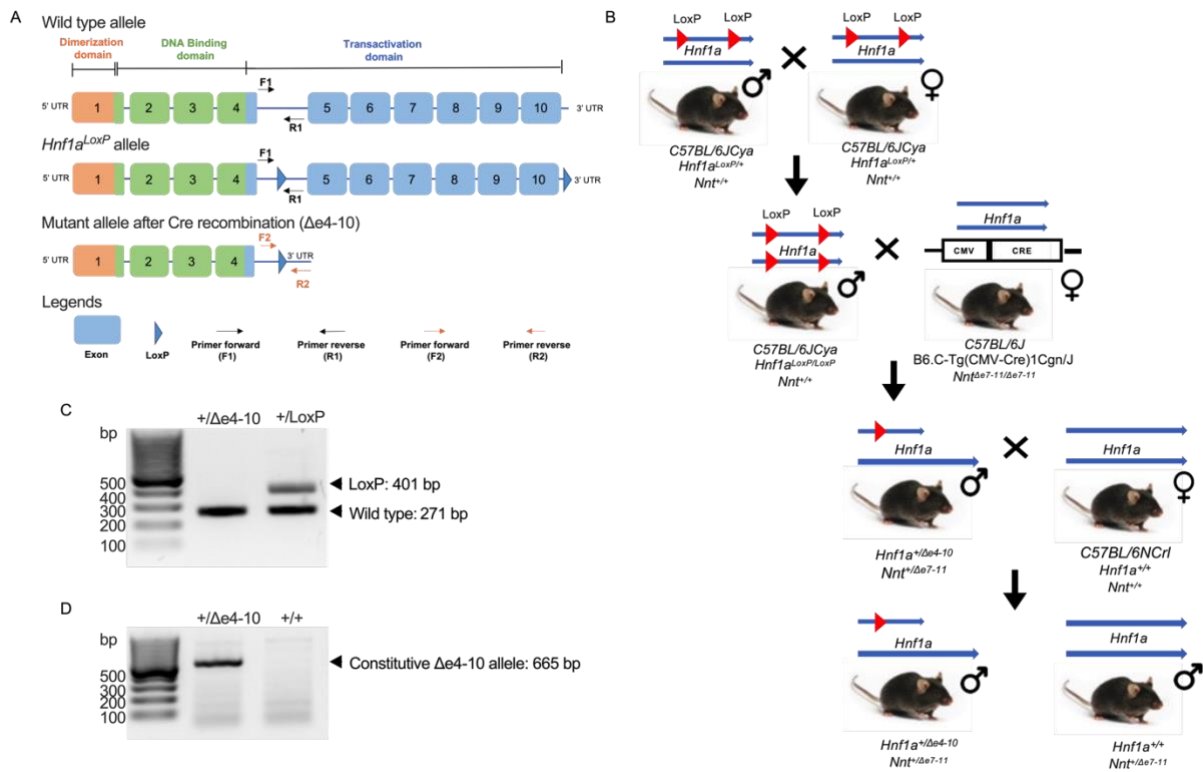

**Supplemental Figure 1. Generation and validation of heterozygous *Hnf1a<sup>+Δe4-10</sup>* mice. (A)**

Schematic representation of the *Hnf1a* gene structure showing wild-type allele, *Hnf1a<sup>LoxP</sup>* allele, and mutant allele after Cre recombination ( $\Delta e4-10$ ). The gene contains exons 1-10 with dimerization domain (exons 1-2), DNA binding domain (exons 2-4), and transactivation domain (exons 5-10). Primer locations are indicated: F1/R1 primers flank the LoxP site in intron 4 to detect LoxP sites, while F2/R2 primers in exon 4 and 3'UTR detect the mutant  $\Delta e4-10$  allele after deletion of exons 5-10. (B) Breeding strategy to generate *Hnf1a<sup>+Δe4-10</sup>* mice. *Hnf1a<sup>LoxP/+</sup>* mice (*C57BL/6J*Cya background) were bred to obtain *Hnf1a<sup>LoxP/LoxP</sup>* mice, then crossed with CMV-Cre transgenic mice (*B6.C-Tg(CMV-Cre)1Cgn/J* with *Nnt<sup>Δe7-11/Δe7-11</sup>*) to generate *Hnf1a<sup>+Δe4-10</sup>* mice. Final breeding was with *C57BL/6N*Crl mice (*Hnf1a<sup>+/+</sup>*, *Nnt<sup>+/+</sup>*) to obtain littermate controls. (C) PCR genotyping using F1/R1 primers showing wild-type band (271 bp) and LoxP-containing band (401 bp) to distinguish +/ $\Delta e4-10$  and +/LoxP genotypes. (D) PCR genotyping using F2/R2 primers showing the constitutive  $\Delta e4-10$  allele (665 bp) present only in +/ $\Delta e4-10$  mice but absent in +/+ mice.

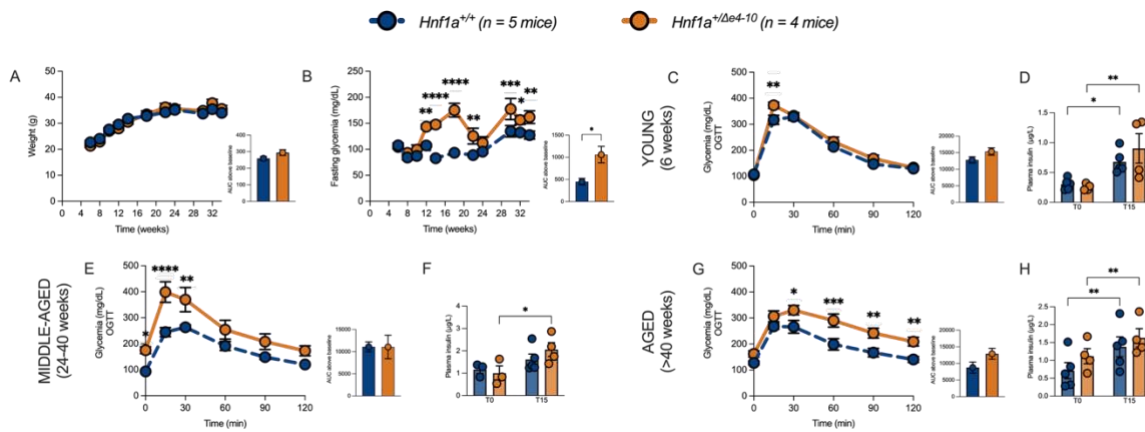

**Supplemental Figure 2. Metabolic parameters in male *Hnf1a*<sup>+/ $\Delta$ e4-10</sup> mice across different age groups.** (A) Body weight of *Hnf1a*<sup>+/+</sup> mice (blue line) and *Hnf1a*<sup>+/ $\Delta$ e4-10</sup> mice (orange line) from 6 to 32 weeks of age. (B) Fasting glycemia after an overnight fast (16 h) from 6 to 32 weeks of age. Young (6 weeks): (C) Glycemia during OGTT (2g/kg) with area under the curve (AUC), (D) plasma insulin (fasting T0 and 15 min T15 after glucose challenge). Middle-aged (24-40 weeks): (E) Glycemia during OGTT with AUC, (F) plasma insulin (fasting T0 and 15 min T15 after glucose challenge). Aged (>40 weeks): (G) Glycemia during OGTT with AUC, (H) plasma insulin (fasting T0 and 15 min T15 after glucose challenge). *Hnf1a*<sup>+/+</sup> male mice (n = 5) and *Hnf1a*<sup>+/ $\Delta$ e4-10</sup> male mice (n = 4). Data are expressed as means  $\pm$  SEM. \*p < 0.05, \*\*p < 0.01, \*\*\*p < 0.001, \*\*\*\*p < 0.0001; Two-way ANOVA with mixed-effects analysis for longitudinal data, unpaired t-test for AUC and insulin comparisons.

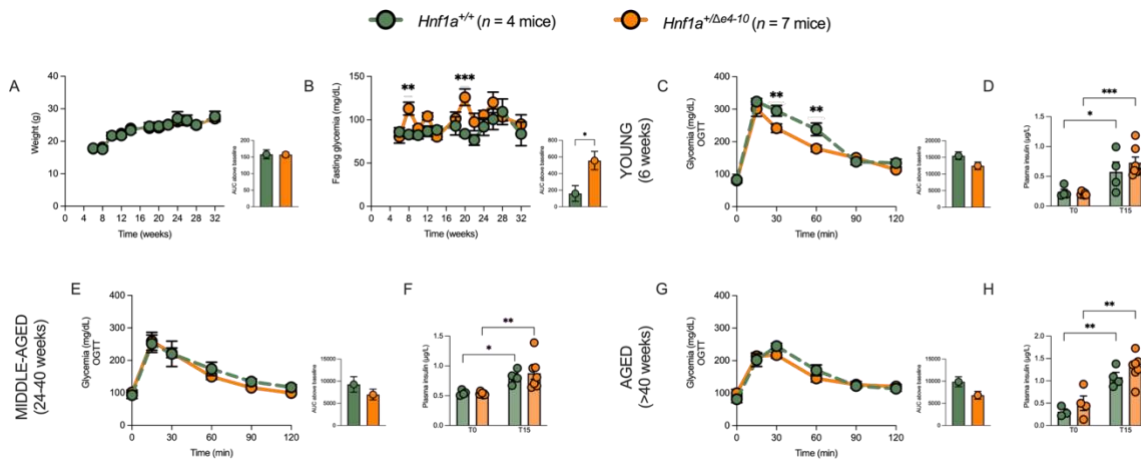

**Supplemental Figure 3.** Metabolic parameters in female *Hnf1a*<sup>+/ $\Delta$ e4-10</sup> mice. **(A)** Body weight of *Hnf1a*<sup>+/+</sup> mice (blue line) and *Hnf1a*<sup>+/ $\Delta$ e4-10</sup> mice (orange line) from 6 to 32 weeks of age. **(B)** Fasting glycemia after an overnight fast (16 h) from 6 to 32 weeks of age. Young (6 weeks): **(C)** Glycemia during OGTT (2g/kg) with area under the curve (AUC), **(D)** plasma insulin (fasting T0 and 15 min T15 after glucose challenge). Middle-aged (24-40 weeks): **(E)** Glycemia during OGTT with AUC, **(F)** plasma insulin (fasting T0 and 15 min T15 after glucose challenge). Aged (>40 weeks): **(G)** Glycemia during OGTT with AUC, **(H)** plasma insulin (fasting T0 and 15 min T15 after glucose challenge). *Hnf1a*<sup>+/+</sup> female mice (n = 4) and *Hnf1a*<sup>+/ $\Delta$ e4-10</sup> female mice (n = 7). Data are expressed as means  $\pm$  SEM. \*p < 0.05, \*\*p < 0.01, \*\*\*p < 0.001; Two-way ANOVA with mixed-effects analysis for longitudinal data, unpaired t-test for AUC and insulin comparisons.

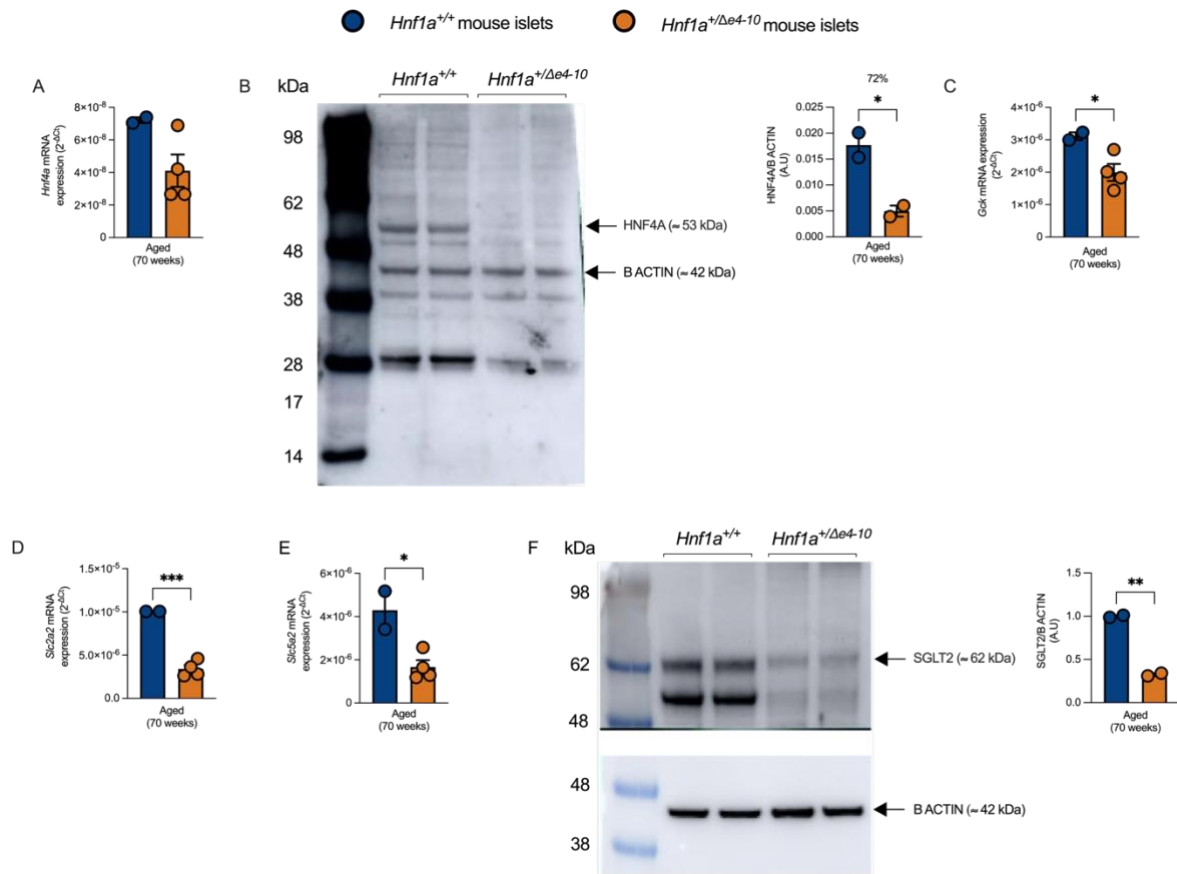

**Supplemental Figure 4. Islet gene and protein expression in aged mice (70 weeks).** (A) *Hnf4a* mRNA expression. (B) Representative Western blot and quantification of HNF4A protein levels. (C) *Gck* mRNA expression. (D) *Slc2a2* (GLUT2) mRNA expression. (E) *Slc5a2* (SGLT2) mRNA expression. (F) Representative Western blot and quantification of SGLT2 protein levels. Protein abundance was normalized to  $\beta$ -ACTIN. Data are presented as mean  $\pm$  SEM. \* $p < 0.05$ , \*\* $p < 0.01$ , and \*\*\* $p < 0.001$ . Unpaired t-test for qPCR and Western blot analysis.

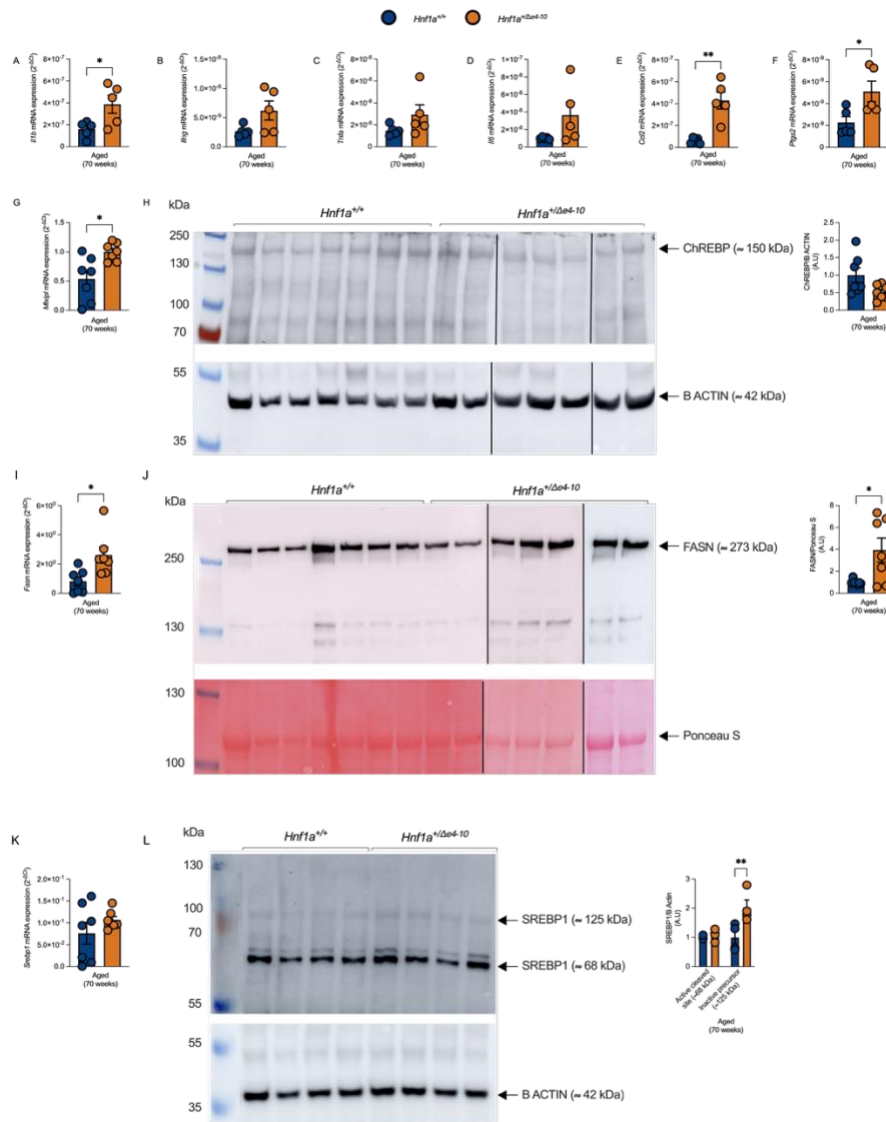

**Supplemental Figure 5. Hepatic inflammatory and lipogenic profiles in aged mice (70 weeks).** (A-F) mRNA expression of inflammatory markers: (A) *Il1b*, (B) *Ifng*, (C) *Tnfa*, (D) *Il6*, (E) *Ccl2*, and (F) *Ptgs2*. (G) *Mlxipl* (ChREBP) mRNA expression. (H) Representative Western blot and quantification of ChREBP protein ( $\approx 150$  kDa) normalized to  $\beta$ -ACTIN. (I) *Fasn* mRNA expression. (J) Representative Western blot and quantification of FASN protein ( $\approx 273$  kDa) normalized to Ponceau S. (K) *Srebp-1* mRNA expression. (L) Representative Western blot and quantification of SREBP-1 protein forms (precursor  $\approx 125$  kDa; active cleaved  $\approx 68$  kDa) normalized to  $\beta$ -ACTIN. Data are presented as mean  $\pm$  SEM. \* $p < 0.05$ , \*\* $p < 0.01$ ; unpaired t-tests were used for statistical comparisons.

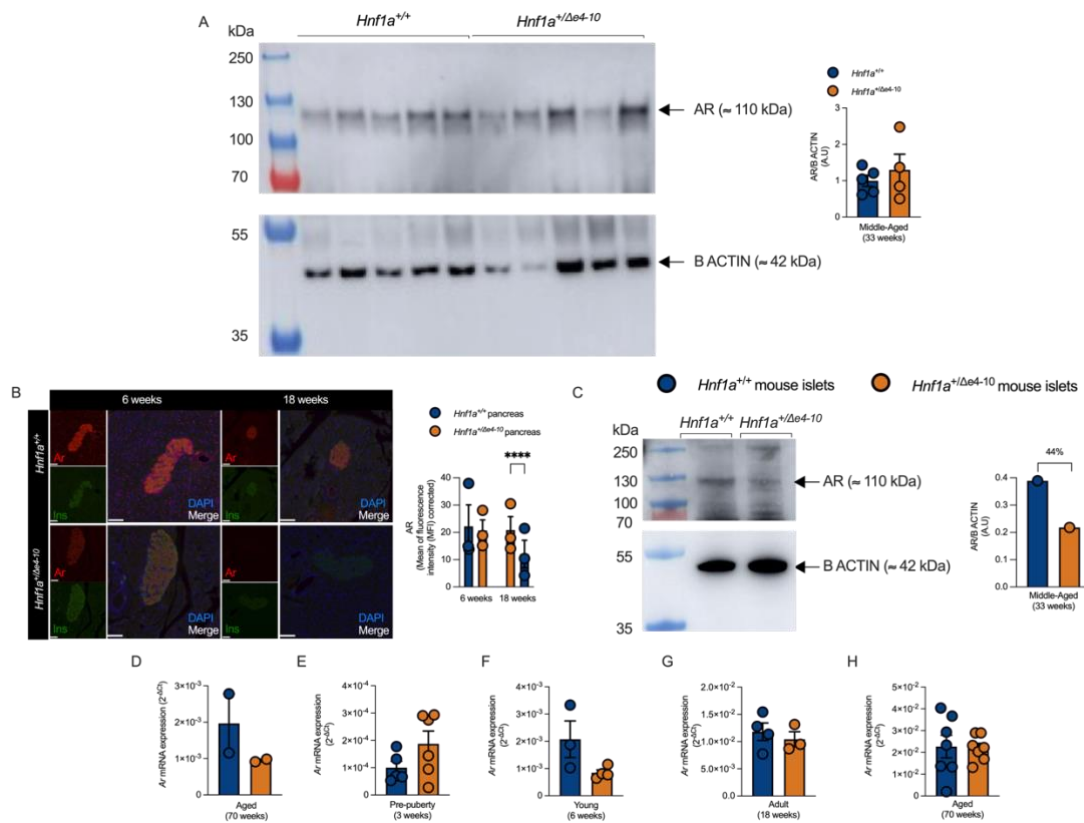

**Supplemental Figure 6. Androgen receptor expression profile in testis, pancreatic tissues and liver.** (A) Representative Western blot and quantification of AR protein (~110 kDa) in testis from middle-aged mice (33 weeks). B-ACTIN (~42 kDa) was used as a loading control. (B) Representative immunofluorescence images of pancreatic sections from young (6 weeks) and adult (18 weeks) mice stained for AR (red), Insulin (green), and DAPI (blue). The bar graph represents the quantification of mean nuclear AR fluorescence intensity (MFI) in islets. (C) Western blot analysis of AR protein expression (~110 kDa) in pancreatic islets from *Hnf1a*<sup>+/+</sup> and *Hnf1a*<sup>+/ $\Delta$ e4-10</sup> mice. B-ACTIN (~42 kDa) was used as a loading control. **Right:** Quantification of AR protein levels normalized to B-ACTIN. (D) *Ar* mRNA expression in isolated islets of aged mice (70 weeks). (E-H) Quantitative PCR analysis of *Ar* mRNA levels in the livers of (E) pre-pubertal mice, (F) young mice, (G) adult mice, and (H) aged mice ( $n = 3-7$  mice per group). Gene expression was normalized to *Rplp0* mRNA using the  $2^{-\Delta C_t}$  method. Data are presented as mean  $\pm$  SEM. \*\*\*\* $p < 0.0001$ .

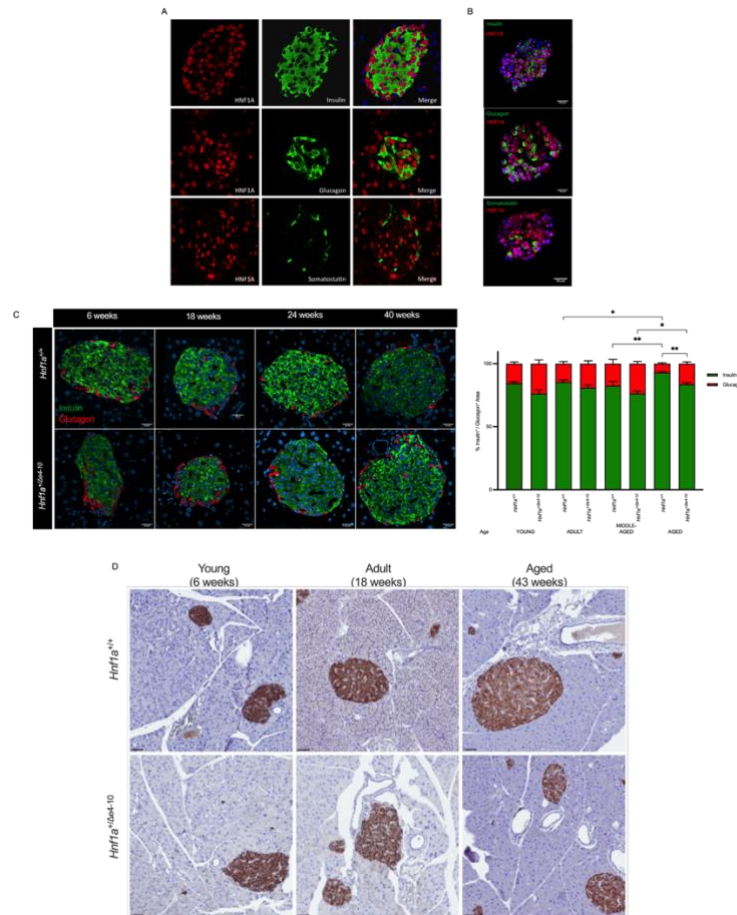

**Supplemental Figure 7. HNF1A protein expression in pancreatic endocrine cells and age-dependent islet remodeling.** (A) Representative immunofluorescence staining of mouse pancreatic sections showing HNF1A (red) localization in insulin-positive  $\beta$ -cells (top), glucagon-positive  $\alpha$ -cells (middle), and somatostatin-positive  $\delta$ -cells (bottom). All hormones are stained in green; nuclei are counterstained with DAPI (blue). Scale bars = 20  $\mu$ m. (B) Representative HNF1A (red) expression in human islets co-stained with insulin, glucagon, and somatostatin (green). Nuclei counterstained with DAPI (blue). Scale bars = 20  $\mu$ m. (C) Representative immunofluorescence images of pancreatic islets from *Hnf1a*<sup>+/+</sup> and *Hnf1a*<sup>+/ $\Delta$ e4-10</sup> mice at different ages (Young: 6 weeks; Adult: 18 weeks; Middle-aged: 24 weeks; Aged: 43 weeks) showing insulin (green) and glucagon (red) distribution. **Right panel:** Quantification of insulin-positive and glucagon-positive areas as a percentage of total islet area across age groups (Young, Adult, Middle-aged, and Aged). Data are presented as mean  $\pm$  SEM. \* $p < 0.05$ . (D) Histological analysis with Masson's trichrome staining showing fat accumulation in *Hnf1a*<sup>+/ $\Delta$ e4-10</sup> pancreas compared to normal architecture in *Hnf1a*<sup>+/+</sup> mice from 6, 18 and 43 weeks. Representative images at 40X magnification; scale bars = 50  $\mu$ m.

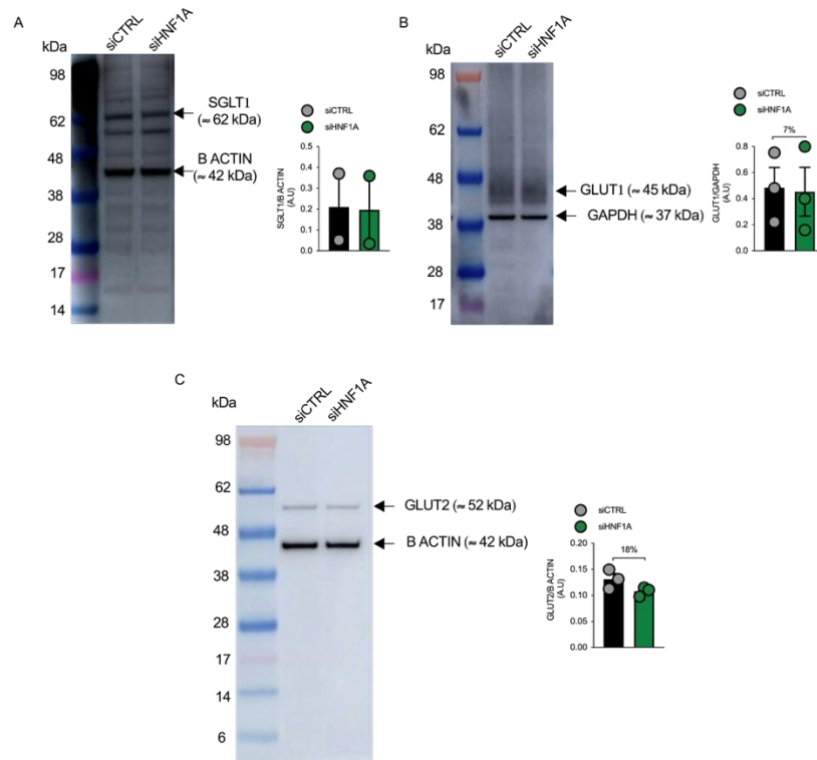

**Supplemental Figure 8. Glucose transporter protein expression analysis in human islets after HNF1A knockdown.** Western blot analysis of (A) SGLT1 ( $\approx 62$  kDa), (B) GLUT1 ( $\approx 45$  kDa), and (C) GLUT2 ( $\approx 52$  kDa) protein levels in human islets transfected with control siRNA (siCTRL) or HNF1A siRNA (siHNF1A). Right panels show quantification of protein levels normalized to  $\beta$ -actin ( $\approx 42$  kDa) for SGLT1 and GLUT2, and to GAPDH ( $\approx 37$  kDa) for GLUT1. GLUT1 shows a 7% reduction and GLUT2 shows an 18% reduction after HNF1A knockdown, while SGLT1 levels remain unchanged. Protein levels were normalized to appropriate loading controls. Data are presented as means  $\pm$  SEM with percentage changes indicated. Statistical analysis performed using unpaired t-tests.

**Supplemental Table 1. Donor Characteristics**

| Donor ID | Age (years) | Sex (M/F) | BMI (kg/m <sup>2</sup> ) | HbA1c | Diabetes | Cause of death   | Cold ischaemia time (h :min) | Estimated purity (%) | Estimated viability (%) | Total culture time (h) | GSIS assay | Additional notes        |
|----------|-------------|-----------|--------------------------|-------|----------|------------------|------------------------------|----------------------|-------------------------|------------------------|------------|-------------------------|
| H1093    | 46          | M         | 25.3                     | 5.1   | No       | Choking          | 07 :52                       | 90                   | 98.8                    | 20                     | 1.37       | <i>HNFI</i> A silencing |
| H1095    | 56          | M         | 30.5                     | 5.5   | No       | Choking          | 07 :22                       | 80                   | 98.1                    | 23                     | 2.77       | <i>HNFI</i> A silencing |
| H1097    | 53          | F         | 29.1                     | 5.3   | No       | Traumatic stroke | 03 :23                       | 90                   | 94.5                    | 10                     | 1.76       | <i>HNFI</i> A silencing |
| H1099    | 54          | F         | 24.3                     | 5.8   | No       | Stroke           | 07 :02                       | 90                   | 96.2                    | 60                     | 4.74       | <i>HNFI</i> A silencing |
| H1102    | 46          | F         | 23.7                     | 5.1   | No       | Head trauma      | 04 :25                       | 80                   | 96.3                    | 20                     | 4.23       | <i>HNFI</i> A silencing |
| H1105    | 55          | F         | 27.5                     | 5.5   | No       | Head trauma      | 07 :43                       | 80                   | 96                      | 20                     | 3.69       | <i>HNFI</i> A silencing |
| H1109    | 65          | F         | 27.4                     | 6.1   | No       | Stroke           | 06 :11                       | 90                   | 99                      | 18                     | 0.91       | <i>HNFI</i> A silencing |
| H1114    | 50          | M         | 34                       | 5.5   | No       | Suicide          | 05 :50                       | 95                   | 99.2                    | 21                     | 2.93       | <i>HNFI</i> A silencing |
| H1119    | 61          | M         | 25.1                     | 5.6   | No       | Choking          | 08:15                        | 80                   | 91.9                    | 15                     | 3.68       | <i>HNFI</i> A silencing |

**Supplemental Table 2. Mouse details**

| GROUP Number                                 | Number <i>Hnfla</i> <sup>+/+</sup> | Number <i>Hnfla</i> <sup>+/<math>\Delta</math>e4-10</sup> | Sacrifice age | Number of Backcrosses | Used for experiment                                                                                                                                                                                                                                                                                            |
|----------------------------------------------|------------------------------------|-----------------------------------------------------------|---------------|-----------------------|----------------------------------------------------------------------------------------------------------------------------------------------------------------------------------------------------------------------------------------------------------------------------------------------------------------|
| 1: pilot study males                         | 5                                  | 4                                                         | 34 weeks      | F1                    | <ul style="list-style-type: none"> <li>Supplemental Figure 2</li> <li>Figure 2K and L</li> <li>Figure 3G, H</li> </ul>                                                                                                                                                                                         |
| 2: pilot study females                       | 4                                  | 7                                                         | 32 weeks      | F1                    | <ul style="list-style-type: none"> <li>Supplemental Figure 3</li> </ul>                                                                                                                                                                                                                                        |
| 3: Tissue collection                         | 3                                  | 4                                                         | 6 weeks       | F2                    | <ul style="list-style-type: none"> <li>Figure 1B, C, F and G</li> <li>Figure 3C, D</li> <li>Figure 4H</li> <li>Supplemental Figure 6B</li> <li>Supplemental Figure 7C and D</li> </ul>                                                                                                                         |
| 4: Tissue collection                         | 4                                  | 4                                                         | 12 weeks      | F2                    | <ul style="list-style-type: none"> <li>Figure 3C</li> </ul>                                                                                                                                                                                                                                                    |
| 5: Tissue collection                         | 4                                  | 3                                                         | 18 weeks      | F2                    | <ul style="list-style-type: none"> <li>Figure 3D</li> <li>Figure 4I</li> <li>Supplemental Figure 6B</li> <li>Supplemental Figure 7C and D</li> </ul>                                                                                                                                                           |
| 6: Tissue collection                         | 4                                  | 4                                                         | 24 weeks      | F2                    | <ul style="list-style-type: none"> <li>Figure 3C</li> <li>Supplemental Figure 7C</li> </ul>                                                                                                                                                                                                                    |
| 7: Longitudinal study and Tissue collection  | 5                                  | 8                                                         | 70 weeks      | F1                    | <ul style="list-style-type: none"> <li>Figure 1D.</li> <li>Figure 2A, B, E, F, G, H, I, J, M, N, and O.</li> <li>Supplemental Figure 4.</li> <li>Figure 3B, C, I, J, K, L, M and N</li> <li>Supplemental Figure 5</li> <li>Figure 4J</li> <li>Supplemental Figure 6C</li> <li>Figure 5A, B, C and D</li> </ul> |
| 8: Longitudinal study and Tissue collection  | 5                                  | 5-9                                                       | 43 weeks      | F1                    | <ul style="list-style-type: none"> <li>Figure 2D</li> <li>Figure 3A, B, C</li> <li>Supplemental Figure 7C and D</li> </ul>                                                                                                                                                                                     |
| 9: Longitudinal study and Tissue collection  | 5                                  | 5                                                         | 55 weeks      | F2                    | <ul style="list-style-type: none"> <li>Figure 2V</li> <li>Figure 3C</li> <li>Figure 4B, C, D and E</li> </ul>                                                                                                                                                                                                  |
| 10: Longitudinal study and Tissue collection | 6                                  | 6                                                         | 33 weeks      | F3                    | <ul style="list-style-type: none"> <li>Figure 1H</li> <li>Figure 2U</li> <li>Figure 4F</li> <li>Supplemental Figure 6A</li> </ul>                                                                                                                                                                              |
| 11: Complementary study                      | 6                                  | 9                                                         |               | F4                    | <ul style="list-style-type: none"> <li>Figure 2P, Q, R, and S</li> </ul>                                                                                                                                                                                                                                       |
| 12: Revision study                           | 5                                  | 7                                                         | 3 weeks       | F4                    | <ul style="list-style-type: none"> <li>Figure 2C, T</li> <li>Figure 3E, F</li> <li>Figure 4A, G</li> </ul>                                                                                                                                                                                                     |
| <b>Total:</b>                                |                                    |                                                           |               | <b>126</b>            |                                                                                                                                                                                                                                                                                                                |

**Supplemental Table 3. Primers for genotyping**

| <b>Mouse line</b>                                      | <b>Forward sequence (5'-3')</b> | <b>Reverse sequence (5'-3')</b>             |
|--------------------------------------------------------|---------------------------------|---------------------------------------------|
| CMV-Cre                                                | gcggtctggcagtaaaaactatc         | gtgaaacagcattgctgtcact                      |
| Hnf1a <sup>LoxP/LoxP</sup> (Neo-del cassette)<br>F1-R1 | ccgtaacaagacctgatttcct          | ggctcagagaactaaacggaaatg                    |
| Constitutive Δe4-10 allele<br>F2-R2                    | tggacactacactgtattggctg         | tattctaacagcagggatgggtgg                    |
| Hnf1a <sup>LoxP/LoxP</sup> ::CMV-Cre<br>F3-R3-R3.1     | aatcccgatgtggacacttac           | aatggaaccgagccttacag<br>ccactcctgtccaagcatt |

**Supplemental Table 4. Hormone Measurement kits**

| <b>Samples</b> | <b>Hormone</b> | <b>Glucose stimulated hormone secretion</b> | <b>Hormone measurement</b>                                        | <b>Dilutions</b>                                                       |
|----------------|----------------|---------------------------------------------|-------------------------------------------------------------------|------------------------------------------------------------------------|
| Human islets   | Insulin        | Perifusion technique                        | Immunoassay system                                                | Supernatant :<br>No diluted<br>Content :<br>1/2114<br>1/3844<br>1/5761 |
| Human islets   | Glucagon       | Perifusion technique                        | Glucagon ELISA kit Mercodia<br>Cat No 10-1271-01                  | Supernatant :<br>No diluted<br>Content :<br>1/500<br>1/1000<br>1/2000  |
| Human islets   | Glucagon       | Static incubation technique                 | Glucagon ELISA kit Mercodia<br>Cat No 10-1271-01                  | Supernatant :<br>1/50<br>Content :<br>1/500                            |
| Mouse islets   | Insulin        | Perifusion technique                        | Insulin ELISA kit Mercodia<br>Cat No 10-1247-01                   | Supernatant :<br>No diluted<br>Content :<br>1/500<br>1/1000<br>1/2000  |
| Mouse islets   | Glucagon       | Static incubation technique                 | Glucagon ELISA kit Mercodia<br>Cat No 10-1281-01                  | Supernatant :<br>No diluted<br>Content :<br>1/500                      |
| Mouse serum    | Insulin        | Fasting and during an OGTT                  | Insulin ultrasensitive ELISA kit<br>Mercodia<br>Cat No 10-1249-01 | No dilution                                                            |
| Mouse serum    | Glucagon       | Fasting and during an OGTT                  | Glucagon ELISA kit Mercodia<br>Cat No 10-1281-01                  | No dilution                                                            |
| Mouse serum    | Proinsulin     | Fasting and during an OGTT                  | Rat/Mouse Proinsulin ELISA kit<br>Mercodia<br>Cat No 10-1232-01   | No dilution                                                            |
| Mouse serum    | Testosterone   | Fasting                                     | Testosterone rat/mouse ELISA<br>Demeditec<br>Cat No DEV9911       | No dilution                                                            |

**Supplemental Table 5. Primers for qPCR**

| Species | Gene                 | Forward sequence (5' – 3') | Reverse sequence (5' – 3') |
|---------|----------------------|----------------------------|----------------------------|
| Human   | <i>HNF1A</i>         | acctgtgcagagccatgtga       | ttggtggtctcggatgag         |
|         | <i>RPL27</i>         | tctggtggctggaattgacc       | ccttgtggcattagggtgattg     |
| Mouse   | <i>Hnf1a exon 1</i>  | agaacgcgtggctctgaag        | ggatgttgtctgctgcaag        |
|         | <i>Hnf1a exon 10</i> | cctggtgtgtatcagagttc       | gccatctgggtggagata         |
|         | <i>Hnf4a</i>         | ggcatggatatggccgacta       | tcttctcacgctctcctg         |
|         | <i>Slc5a1</i>        | gtatggtgtggtggccgatt       | gcagatactccggcatcgtc       |
|         | <i>Slc5a2</i>        | ggtattcatcgtggcggtgt       | gcccagccaaagaagaact        |
|         | <i>Slc2a1</i>        | atggatcccagcagcaagaa       | gcggtggttccatgtttgat       |
|         | <i>Slc2a2</i>        | attcggacttcttgggcc         | tctggtcggttctcgg           |
|         | <i>Mxipl</i>         | ggctgactccctctcagca        | ggtggggaatggaaggagag       |
|         | <i>Srebp-1</i>       | acgcctgtgaagggttactc       | tgaccggaacacatcgactg       |
|         | <i>Fasn</i>          | agatggaaggctggctcta        | ccttgaaccactcacacc         |
|         | <i>Gck</i>           | gcactcggagatctctt          | tcgagaagtcccacgatgt        |
|         | <i>Ar</i>            | ggcggtcattcagtattcc        | ccaagtcaggtgcaaagtag       |
|         | <i>Rplp0</i>         | ccacactgctgaacatgctg       | ccctcagaaaagcgagagtg       |
|         | <i>Rpl27</i>         | tggaattgaccctatcccc        | gtggcatgaggtggttga         |
|         | <i>Il1b</i>          | gtgtgtgacgttcccattag       | tgtccattgaggtggagag        |
|         | <i>Ifng</i>          | ctcttctcatggctgttctc       | ccacatctatgccacttgag       |
|         | <i>Tnfa</i>          | cctatgtctcagcctcttct       | gggaacttctcatcctttg        |
|         | <i>Il6</i>           | agttgccttctggactga         | tccacgatttccagagaac        |
|         | <i>Ccl2</i>          | aggaatgggtccagacat         | ctacagaagtgcttgaggtg       |
|         | <i>Ptgs2</i>         | gggtgtgaagggaataagg        | agtgctggcgaagaatg          |

Supplemental Table 6. Ponceau Red Staining

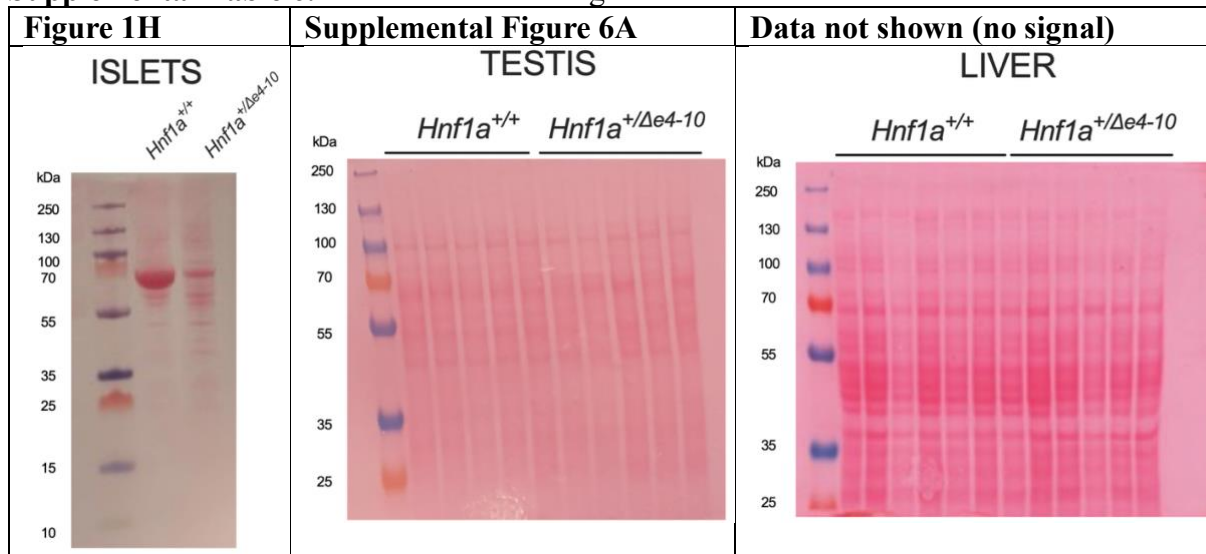

**Supplemental Table 7. Antibodies for IF and WB**

| Antibody                        | Manufacturer      | Catalogue number | Species /Type          | Technique | Dilution | Antigen Retrieval/Preincubation                               |
|---------------------------------|-------------------|------------------|------------------------|-----------|----------|---------------------------------------------------------------|
| Anti-HNF1A                      | Abcam             | ab96777          | Rabbit /Polyclonal     | IF        | 1:100    | Citrate buffer pH: 6. Waterbath 95°C. Time: 45 minutes<br>N/A |
|                                 |                   |                  |                        | WB        | 1:1000   |                                                               |
| Anti-AR                         | Abcam             | ab108341         | Rabbit /Monoclonal     | WB        | 1:1000   | N/A                                                           |
|                                 | Merck Milipore    | 06-680           | Rabbit/ Polyclonal     | IF        | 1:100    | Citrate buffer pH: 6. Waterbath 95°C. Time: 45 minutes        |
| Anti-Insulin                    | Abcam             | ab181547         | Rabbit /Monoclonal     | WB        | 1:5000   | N/A                                                           |
|                                 | Dako              | A0564            | Guinea Pig /Polyclonal | IF        | 1:500    | Citrate buffer pH: 6. Waterbath 95°C. Time: 45 minutes        |
| Anti-SGLT2                      | Novus Biologicals | NBP1-92384       | Rabbit /Polyclonal     | WB        | 1:1000   | N/A                                                           |
| Anti-Glucagon                   | Abcam             | ab92517          | Rabbit /Monoclonal     | WB        | 1:5000   | N/A                                                           |
|                                 | Gentex            | GTX10988         | Mouse /Monoclonal      | IF        | 1:1000   | Citrate buffer pH: 6. Waterbath 95°C. Time: 45 minutes        |
| Anti-Somatostatin               | Merck Milipore    | MAB354           | Rat /Polyclonal        | IF        | 1:500    | Citrate buffer pH: 6. Waterbath 95°C. Time: 45 minutes        |
| Anti-SGLT1                      | Merck Milipore    | 07-1417          | Rabbit /Polyclonal     | WB        | 1:1000   | N/A                                                           |
| Anti-GLUT2                      | Novus Biologicals | NBP2-22218       | Rabbit /Polyclonal     | WB        | 1:1000   | N/A                                                           |
| Anti-GLUT1                      | Invitrogen        | PA5-32428        | Rabbit /Polyclonal     | WB        | 1:1000   | N/A                                                           |
| Anti-HNF4A                      | Abcam             | ab201460         | Rabbit /Monoclonal     | WB        | 1:5000   | N/A                                                           |
| Anti-CHREBP                     | Novus Biologicals | NB400135         | Rabbit/ Polyclonal     | WB        | 1:1000   | N/A                                                           |
| Anti-SREBP-1                    | Abcam             | ab28481          | Rabbit/ Polyclonal     | WB        | 1:1000   | N/A                                                           |
| Anti-FASN                       | Abcam             | ab128870         | Rabbit/ Monoclonal     | WB        | 1:1000   | N/A                                                           |
| Anti-β Actin                    | Sigma             | A5441            | Mouse /Monoclonal      | WB        | 1:5000   | N/A                                                           |
| Anti-GAPDH                      | Sigma             | G9545-100UL      | Rabbit /Polyclonal     | WB        | 1:5000   | N/A                                                           |
| Anti-mouse Alexa Fluor 594      | Invitrogen        | A11032           | N/A                    | IF        | 1:800    | N/A                                                           |
| Anti-rabbit Alexa Fluor 594     | Invitrogen        | A11012           | N/A                    | IF        | 1:800    | N/A                                                           |
| Anti-rabbit Alexa Fluor 488     | Invitrogen        | A21206           | N/A                    | IF        | 1:800    | N/A                                                           |
| Anti-Guinea pig Alexa Fluor 488 | Abcam             | ab150185         | N/A                    | IF        | 1:800    | N/A                                                           |
| Anti-mouse HRP                  | Amersham          | NXA931V          | N/A                    | WB        | 1:10000  | N/A                                                           |
| Anti-rabbit HRP                 | Amersham          | NA934-1ML        | N/A                    | WB        | 1:10000  | N/A                                                           |
